# Supplementary material for: The nature of the electronic ground state of M2C (M = Ti, V, Cr, Zr, Nb, Mo, Hf, Ta, and W) MXenes
Source: Royal Society of Chemistry journal article supplement (doi:10.1039/d3cp04402e), 2023-01-01

**The Nature of the Electronic Ground State of  $M_2C$  (M= Ti, V, Cr, Zr, Nb,  
Mo, Hf, Ta, and W) MXenes**

Néstor García-Romeral, Ángel Morales-García,\* Francesc Viñes, Ibério de P. R Moreira,  
Francesc Illas\*

*Departament de Ciència de Materials i Química Física & Institut de Química Teòrica i  
Computacional (IQTCUB), Universitat de Barcelona, c/ Martí i Franquès 1-11, 08028  
Barcelona, Spain*

\*Corresponding author: [angel.morales@ub.edu](mailto:angel.morales@ub.edu) , [francesc.illas@ub.edu](mailto:francesc.illas@ub.edu)

**Table S1.** Calculated HSE06 and PBE (in parenthesis) Bader charges (Q in a.u.) of metal and carbon atoms in  $M_2C$  (M=Ti, V, Cr, Zr, Nb, Mo, Hf, Ta, and W) using plane waves.

| <b>MXene</b>           | <b>Q(C)</b>   | <b>Q(M)</b> |
|------------------------|---------------|-------------|
| <b>Ti<sub>2</sub>C</b> | -2.62 (-2.35) | 1.31 (1.17) |
| <b>Zr<sub>2</sub>C</b> | -2.44 (-2.16) | 1.22 (1.08) |
| <b>Hf<sub>2</sub>C</b> | -2.75 (-2.47) | 1.37 (1.24) |
| <b>V<sub>2</sub>C</b>  | -2.22 (-2.04) | 1.11 (1.02) |
| <b>Nb<sub>2</sub>C</b> | -2.12 (1.92)  | 1.06 (0.96) |
| <b>Ta<sub>2</sub>C</b> | -2.36 (-2.19) | 1.18 (1.09) |
| <b>Cr<sub>2</sub>C</b> | -1.84 (-1.66) | 0.91 (0.83) |
| <b>Mo<sub>2</sub>C</b> | -1.61 (-1.59) | 0.80 (0.79) |
| <b>W<sub>2</sub>C</b>  | -1.57 (-1.43) | 0.79 (0.72) |

**Table S2.** Energy of the FM solutions relative to the NM (or closed-shell) one ( $\Delta E_{FM-NM}$  in meV) of  $p(1\times 1)$  unit cell of  $M_2C$  ( $M=Ti, V, Cr, Zr, Nb, Mo, Hf, Ta, \text{ and } W$ ) obtained from PBE, PBE0, and HSE06 functionals at the PBE optimized spin-polarized structures, as obtained with VASP and FHI-AIMS codes, the latter marked in italics. The negative sign indicates that the FM solution is more stable than the NM one. For diamagnetic MXenes the most stable FM solution is obtained by fixing the total number of unpaired electrons as described in the text.

| <b>MXene</b>                       | <b>PBE</b>  | <b>PBE0</b>  | <b>HSE06</b> |
|------------------------------------|-------------|--------------|--------------|
| <b>Ti<sub>2</sub>C<sup>a</sup></b> | -135        | -488         | -420         |
|                                    | <i>-155</i> | <i>-506</i>  | <i>-417</i>  |
| <b>Zr<sub>2</sub>C</b>             | -36         | -339         | -274         |
|                                    | <i>20</i>   | <i>-281</i>  | <i>-197</i>  |
| <b>Hf<sub>2</sub>C</b>             | 60          | -191         | -143         |
|                                    | <i>79</i>   | <i>-189</i>  | <i>-105</i>  |
| <b>V<sub>2</sub>C<sup>b</sup></b>  | 769         | 151          | 128          |
|                                    | <i>797</i>  | <i>189</i>   | <i>222</i>   |
| <b>Nb<sub>2</sub>C<sup>b</sup></b> | 1462        | 1246         | 1220         |
|                                    | <i>1497</i> | <i>1286</i>  | <i>1301</i>  |
| <b>Ta<sub>2</sub>C<sup>b</sup></b> | 2140        | 2134         | 2061         |
|                                    | <i>2187</i> | <i>2174</i>  | <i>2177</i>  |
| <b>Cr<sub>2</sub>C</b>             | -25         | -1389        | -1366        |
|                                    | <i>-15</i>  | <i>-1238</i> | <i>-1122</i> |
| <b>Mo<sub>2</sub>C<sup>c</sup></b> | 349         | 292          | 295          |
|                                    | <i>395</i>  | <i>324</i>   | <i>330</i>   |
| <b>W<sub>2</sub>C<sup>c</sup></b>  | 812         | 883          | 841          |
|                                    | <i>867</i>  | <i>1013</i>  | <i>956</i>   |

<sup>a</sup>The values of Ti<sub>2</sub>C from Ref. 45 of the main text have been also included to draw a clear and a wide picture of the influence of the metal atoms in these systems.

<sup>b</sup>Spin-polarized solution fixing two unpaired electrons per unit cell.

<sup>c</sup>Spin-polarized solution fixing one unpaired electron per unit cell.

**Table S3.** Energy of several FM solutions relative to the NM one ( $\Delta E_{FM-NM}$  in meV, respectively) of  $p(1\times 1)$  unit cell of paramagnetic  $\text{Cr}_2\text{C}$  and diamagnetic  $\text{M}_2\text{C}$  (M= Mo, and W) obtained from PBE, PBE0, and HSE06 functionals, at the PBE optimized spin-polarized structures for the corresponding GS, as obtained with VASP and FHI-AIMS codes, the latter marked in italics. These solutions have been estimated fixing the total net spin density per unit cell consistent with the Bader charges.

| MXene                   | $\Delta E_{FM-NM}$ |              |              |
|-------------------------|--------------------|--------------|--------------|
|                         | PBE                | PBE0         | HSE06        |
| $\text{Cr}_2\text{C}^a$ | 2236               | -1320        | -1268        |
|                         | <i>2248</i>        | <i>-1218</i> | <i>-1008</i> |
| $\text{Cr}_2\text{C}^b$ | 875                | -1182        | -1190        |
|                         | <i>907</i>         | <i>-1098</i> | <i>-1011</i> |
| $\text{Cr}_2\text{C}^c$ | 72                 | -77          | -67          |
|                         | <i>82</i>          | <i>-45</i>   | <i>-34</i>   |
| $\text{Mo}_2\text{C}^a$ | 6644               | 4806         | 4886         |
|                         | <i>6767</i>        | <i>4967</i>  | <i>5171</i>  |
| $\text{Mo}_2\text{C}^b$ | 3222               | 2194         | 2224         |
|                         | <i>3277</i>        | <i>2222</i>  | <i>2350</i>  |
| $\text{W}_2\text{C}^a$  | 9118               | 7904         | 7875         |
|                         | <i>9270</i>        | <i>8190</i>  | <i>8395</i>  |
| $\text{W}_2\text{C}^b$  | 4534               | 3882         | 3839         |
|                         | <i>4639</i>        | <i>4051</i>  | <i>4150</i>  |

<sup>a</sup>Spin polarized solution fixing a value of 4 unpaired electrons per unit cell.

<sup>b</sup>Spin polarized solution fixing a value of 3 unpaired electrons per unit cell.

<sup>c</sup>Spin polarized solution fixing a value of 1 unpaired electron per unit cell.

**Table S4.** Energy of AFM solutions relative to the NM one ( $\Delta E_{AFM-NM}$  in meV) of  $p(1\times 1)$  unit cell of paramagnetic  $M_2C$  ( $M=Ti, Zr, Hf,$  and  $Cr$ ) obtained from PBE, PBE0, and HSE06 functionals at the PBE optimized spin-polarized structures with (a) VASP and (b) FHI-AIMS codes. The negative sign indicates that the AFM solutions are more stable than the NM one.

| <b>MXene</b>                       | <b>PBE</b> | <b>PBE0</b> | <b>HSE06</b> |
|------------------------------------|------------|-------------|--------------|
| <b>Ti<sub>2</sub>C<sup>a</sup></b> | -21        | -99         | -73          |
|                                    | -28        | -103        | -73          |
| <b>Zr<sub>2</sub>C</b>             | -39        | -90         | -69          |
|                                    | -20        | -128        | -83          |
| <b>Hf<sub>2</sub>C</b>             | -63        | -81         | -60          |
|                                    | -79        | -89         | -58          |
| <b>Cr<sub>2</sub>C</b>             | 45         | -307        | -263         |
|                                    | 15         | -425        | -342         |

<sup>a</sup>The values of Ti<sub>2</sub>C from Ref. 45 of the main text have been also included to draw a clear and a wide picture of the influence of the metal atoms in these systems.

**Fig. S1.** (a) AFM, (b) FM, and (c) NM projected DOS (in states/eV) for  $\text{Ti}_2\text{C}$  as obtained from calculations with the HSE06 functional at the PBE optimized  $p(1\times 1)$  unit cell. The energy is referenced to the Fermi level (in eV).

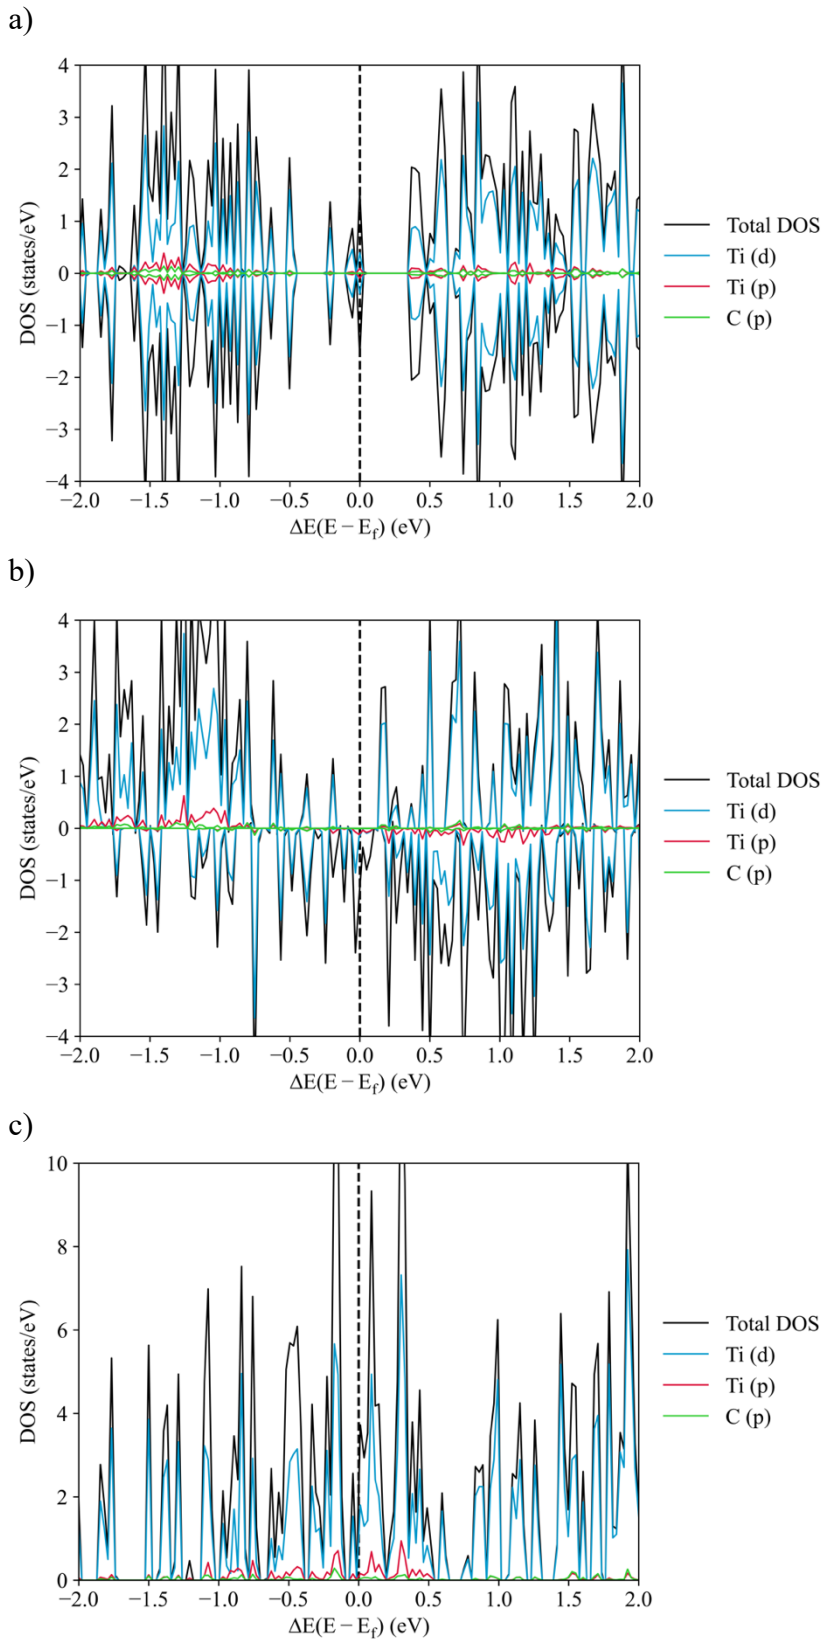

**Fig. S2.** (a) FM and (b) NM projected DOS (in states/eV) for V<sub>2</sub>C as obtained from calculations with the HSE06 functional at the PBE optimized  $p(1\times 1)$  unit cell. The energy is referenced to the Fermi level (in eV).

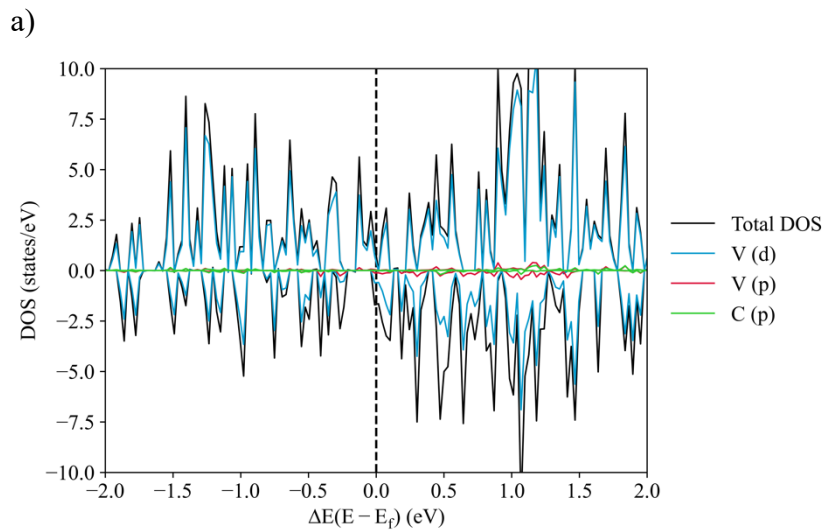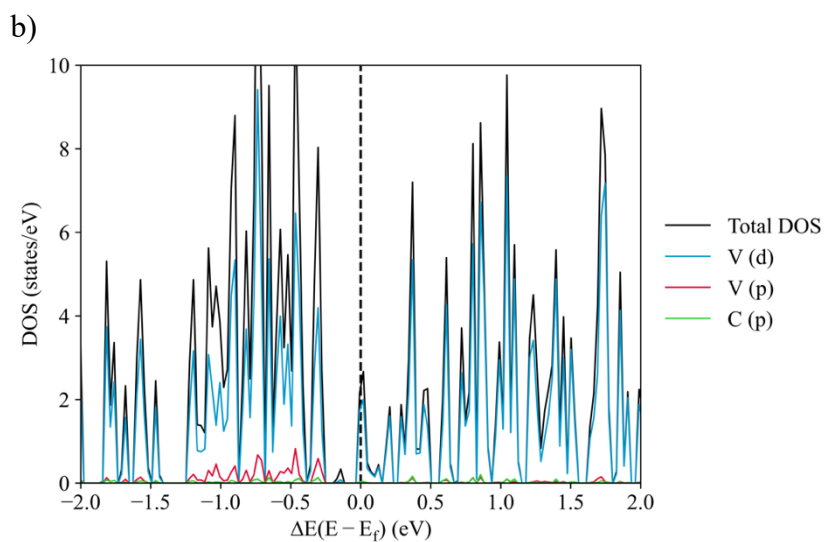

**Fig. S3.** (a) AFM, (b) FM, and (c) NM projected DOS (in states/eV) for Cr<sub>2</sub>C as obtained from calculations with the HSE06 functional at the PBE optimized  $p(1\times 1)$  unit cell. The energy is referenced to the Fermi level (in eV).

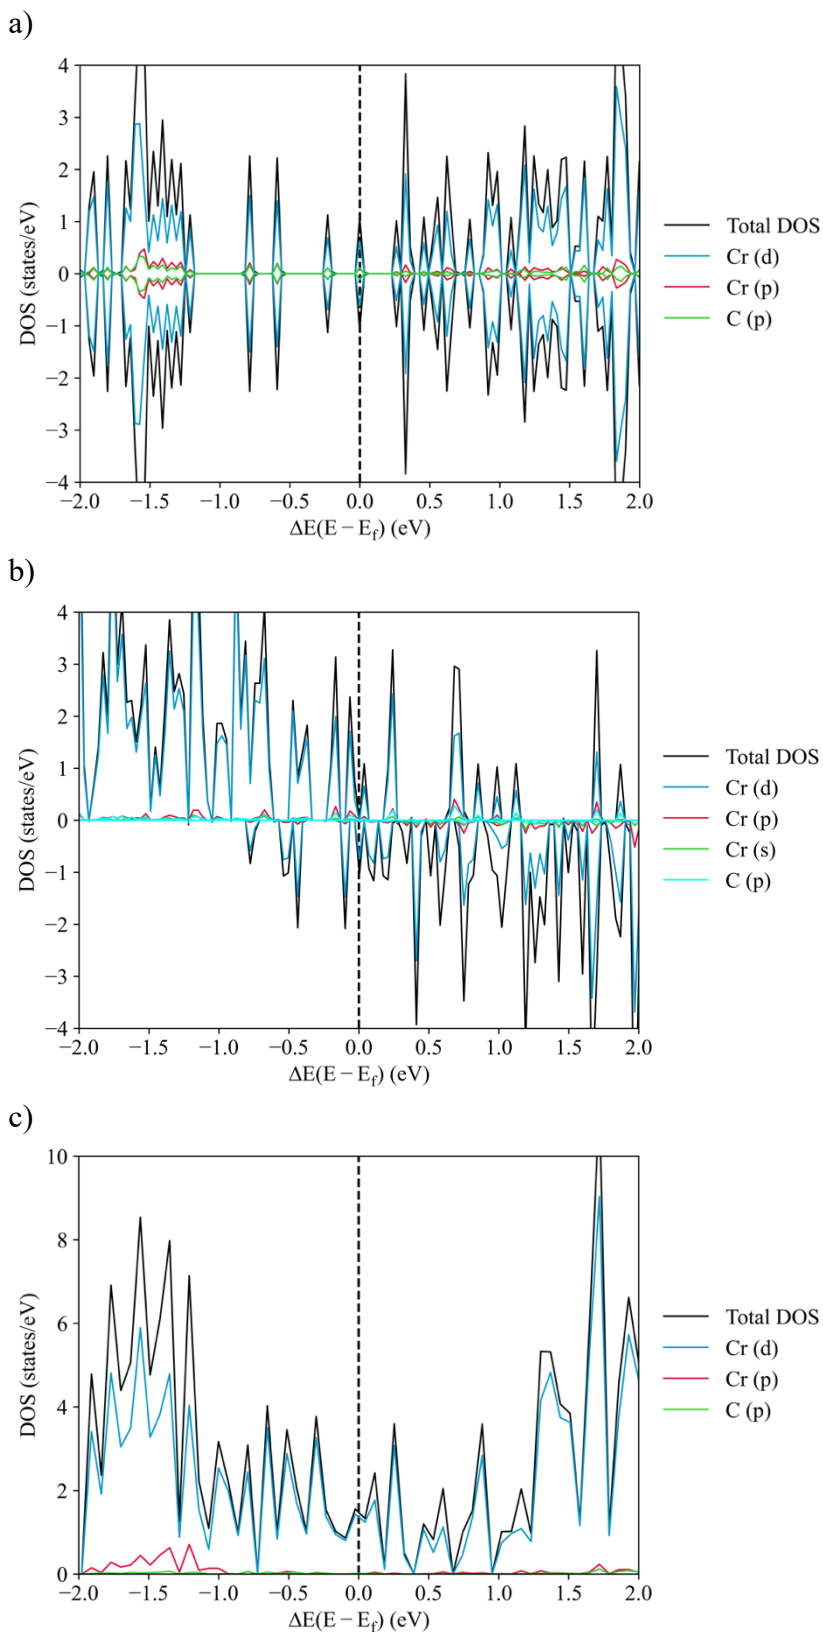



**Fig. S4.** (a) AFM, (b) FM, and (c) NM projected DOS (in states/eV) for  $\text{Zr}_2\text{C}$  as obtained from calculations with the HSE06 functional at the PBE optimized  $p(1\times 1)$  unit cell. The energy is referenced to the Fermi level (in eV).

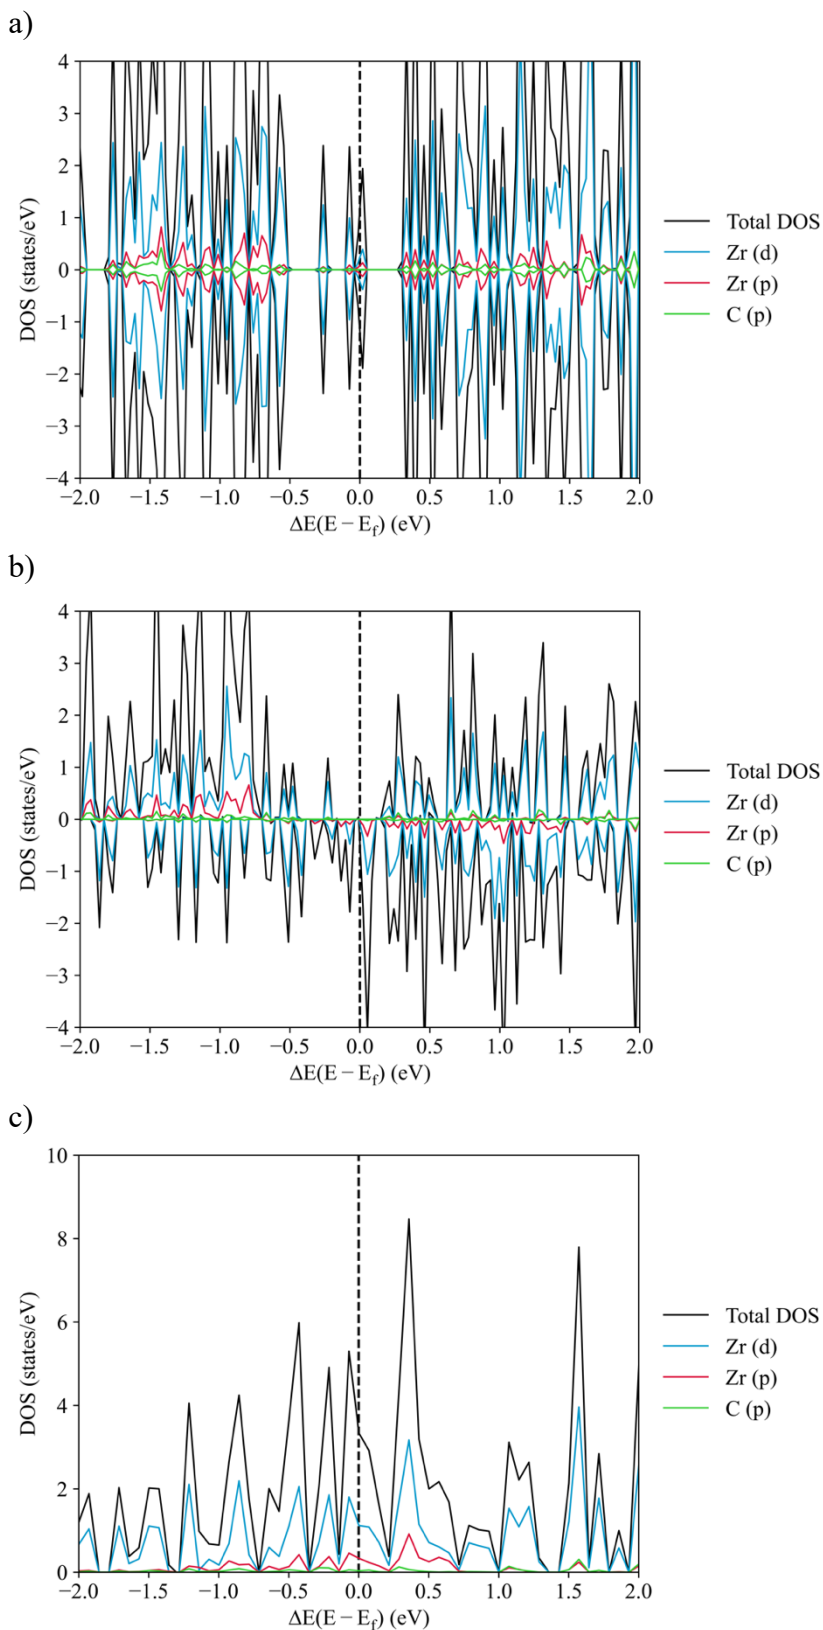

**Fig. S5.** (a) FM and (b) NM projected DOS (in states/eV) for Nb<sub>2</sub>C as obtained from calculations with the HSE06 functional at the PBE optimized  $p(1\times 1)$  unit cell. The energy is referenced to the Fermi level (in eV).

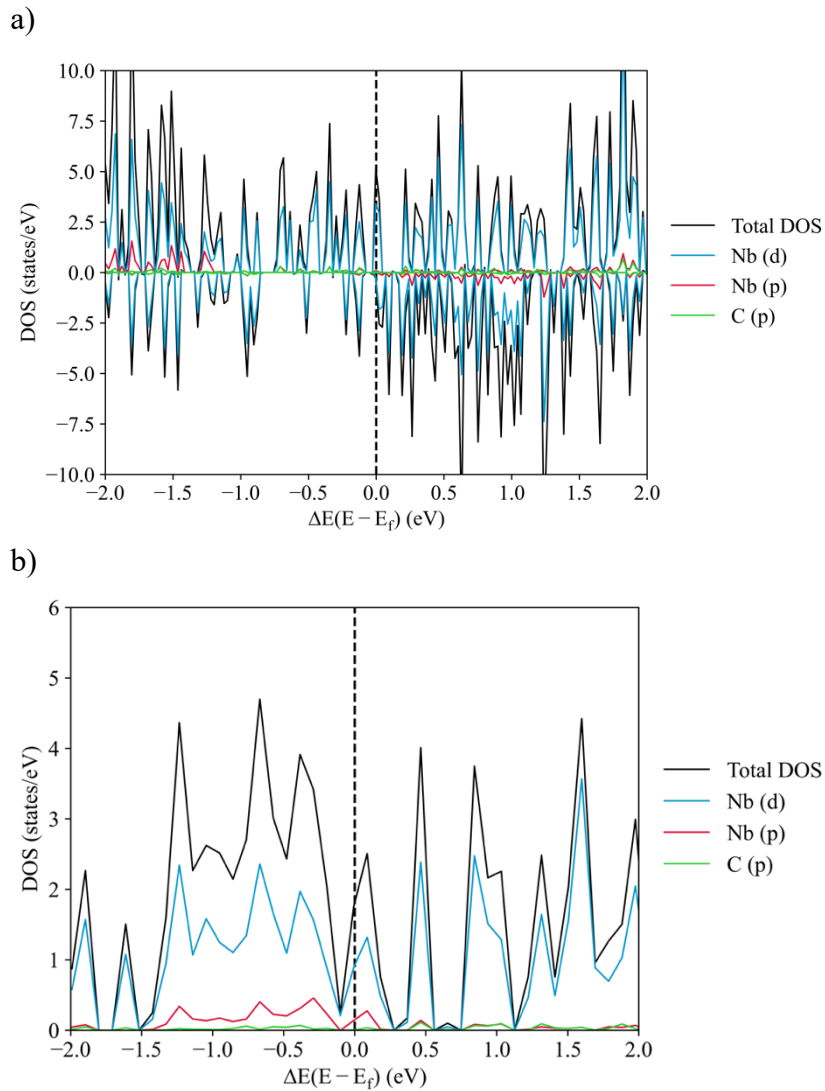

**Fig. S6.** (a) FM and (b) NM projected DOS (in states/eV) for Mo<sub>2</sub>C as obtained from calculations with the HSE06 functional at the PBE optimized  $p(1\times 1)$  unit cell. The energy is referenced to the Fermi level (in eV).

a)

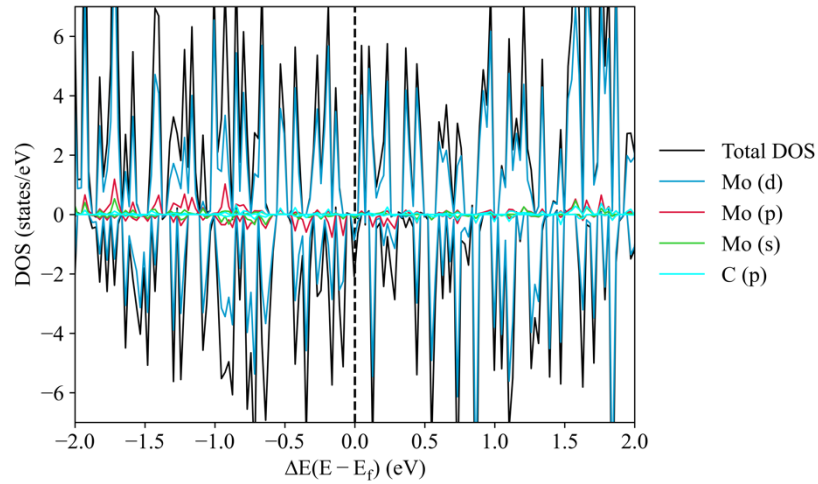

b)

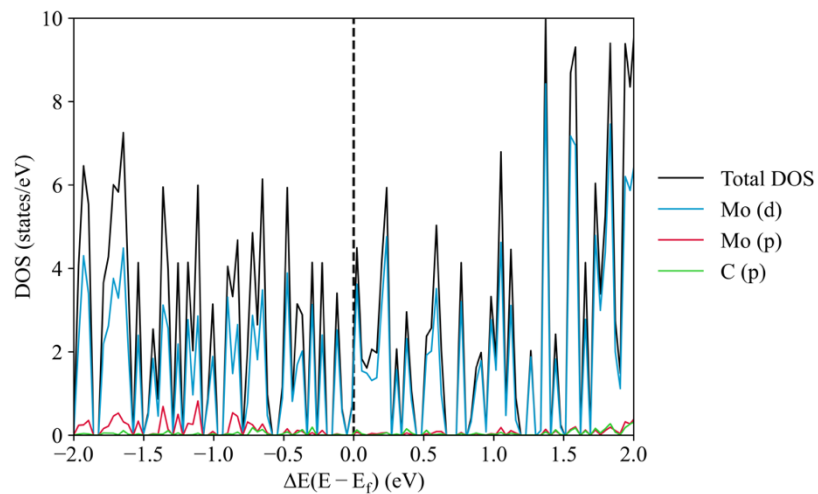

**Fig. S7.** (a) AFM, (b) FM, and (c) NM projected DOS (in states/eV) for Hf<sub>2</sub>C as obtained from calculations with the HSE06 functional at the PBE optimized  $p(1\times 1)$  unit cell. The energy is referenced to the Fermi level (in eV).

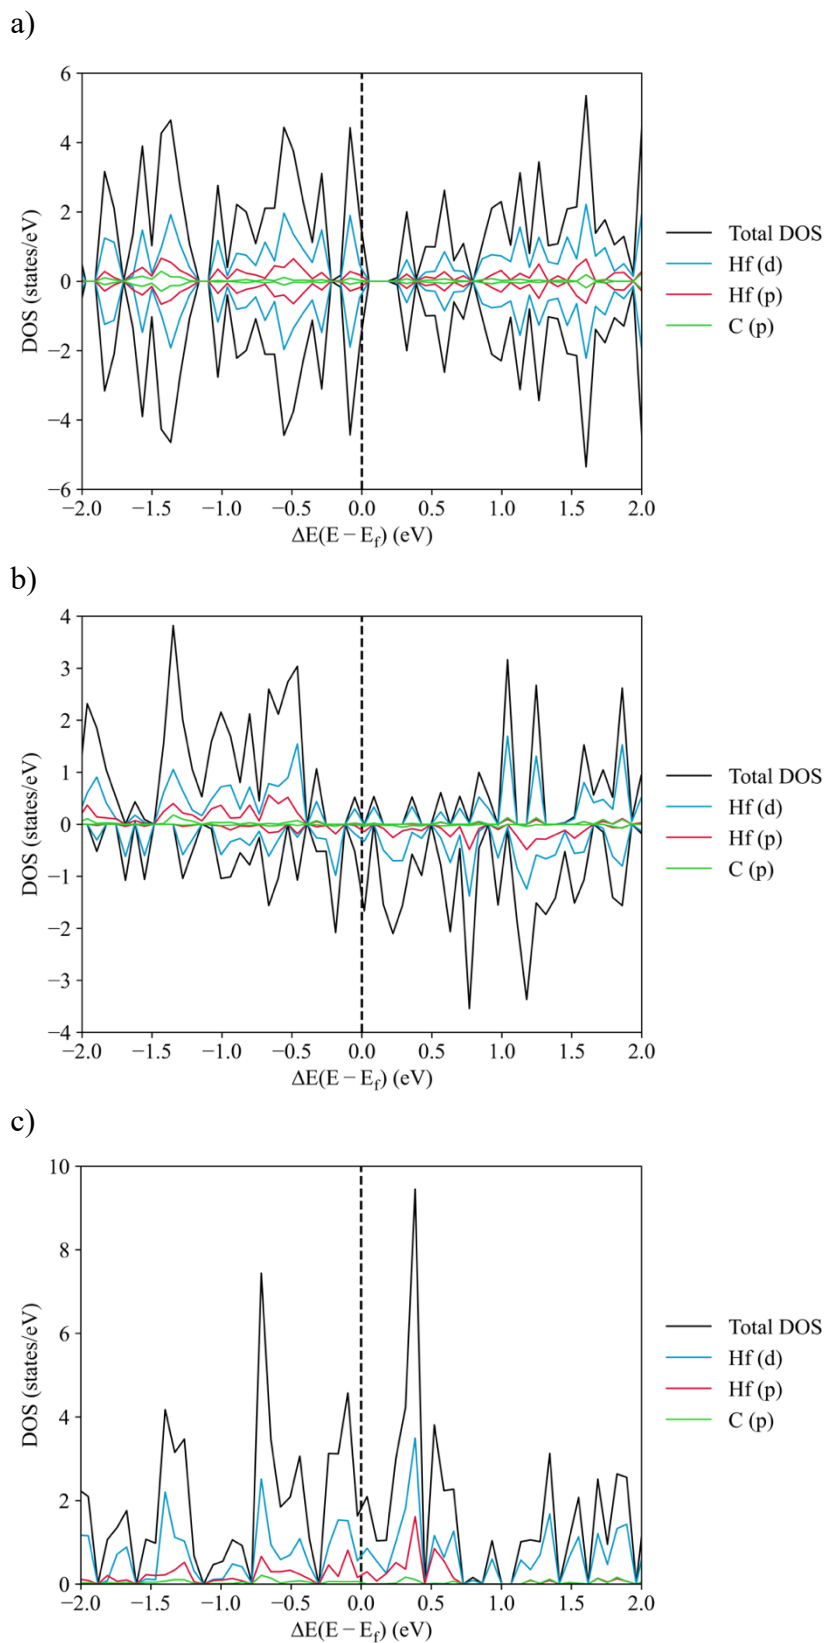

**Fig. S8.** (a) FM and (b) NM projected DOS (in states/eV) for Ta<sub>2</sub>C as obtained from calculations with the HSE06 functional at the PBE optimized  $p(1\times 1)$  unit cell. The energy is referenced to the Fermi level (in eV).

a)

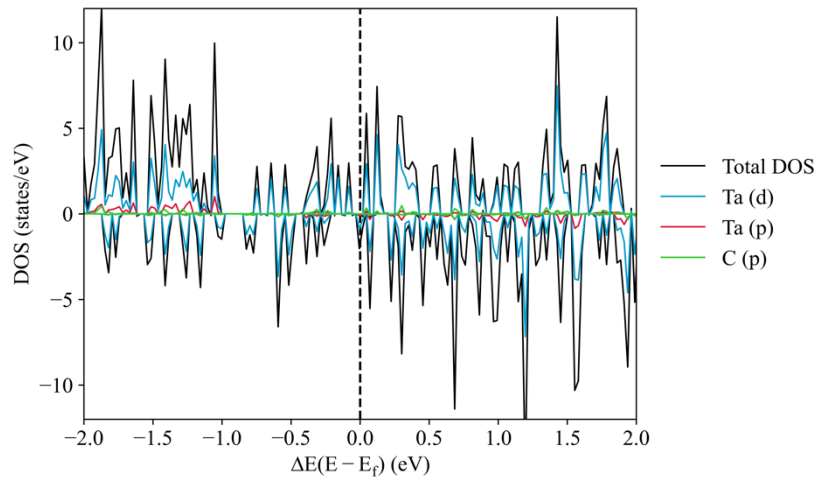

b)

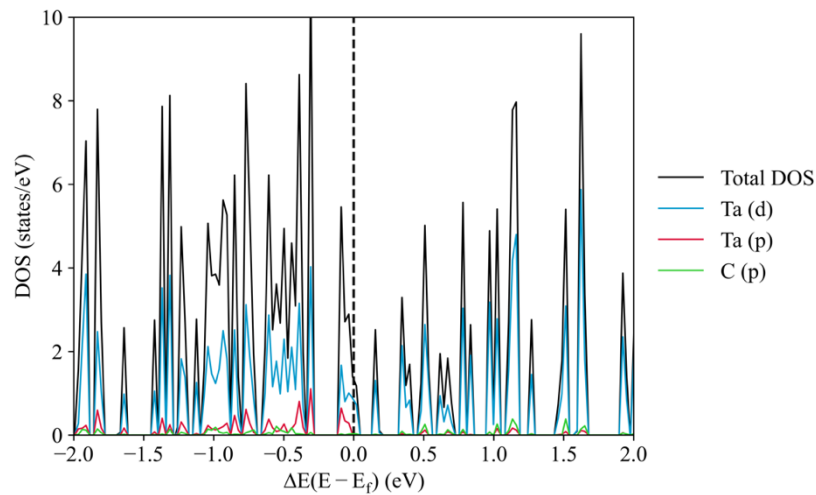

**Fig. S9.** (a) FM and (b) NM projected DOS (in states/eV) for  $W_2C$  as obtained from calculations with the HSE06 functional at the PBE optimized  $p(1 \times 1)$  unit cell. The energy is referenced to the Fermi level (in eV).

a)

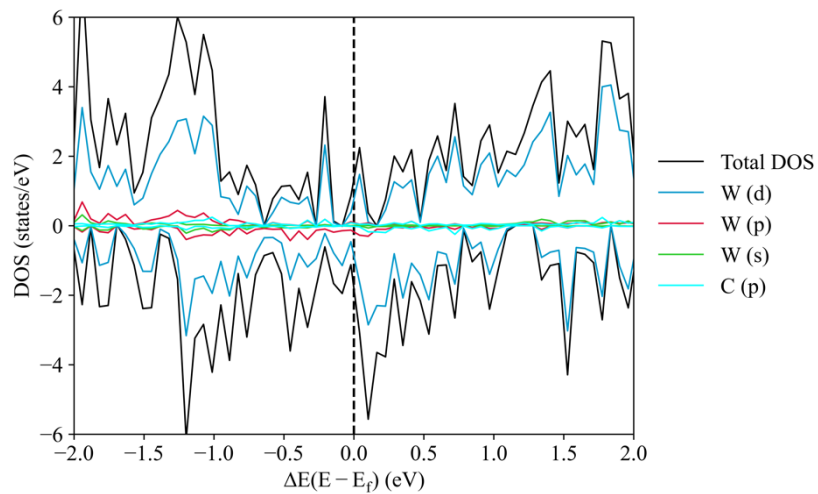

b)

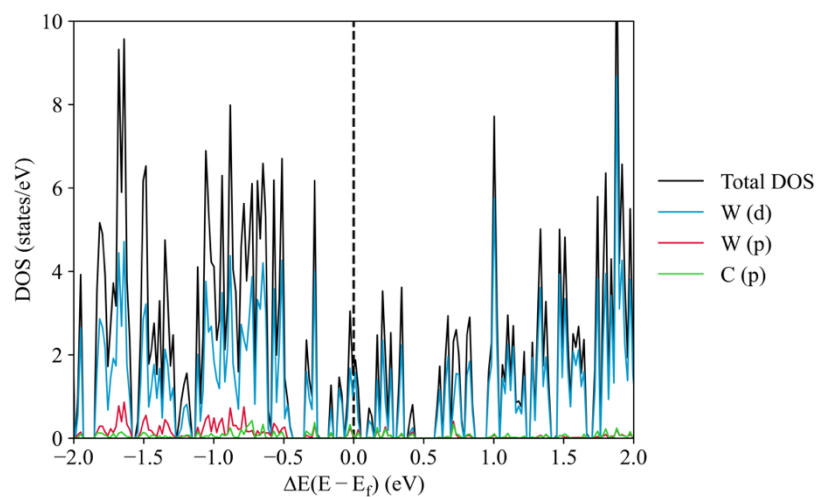

**Fig. S10.** Phonon dispersion of diamagnetic (left) and paramagnetic (right) solutions of Ti<sub>2</sub>C as predicted from the calculations with the PBE functional.

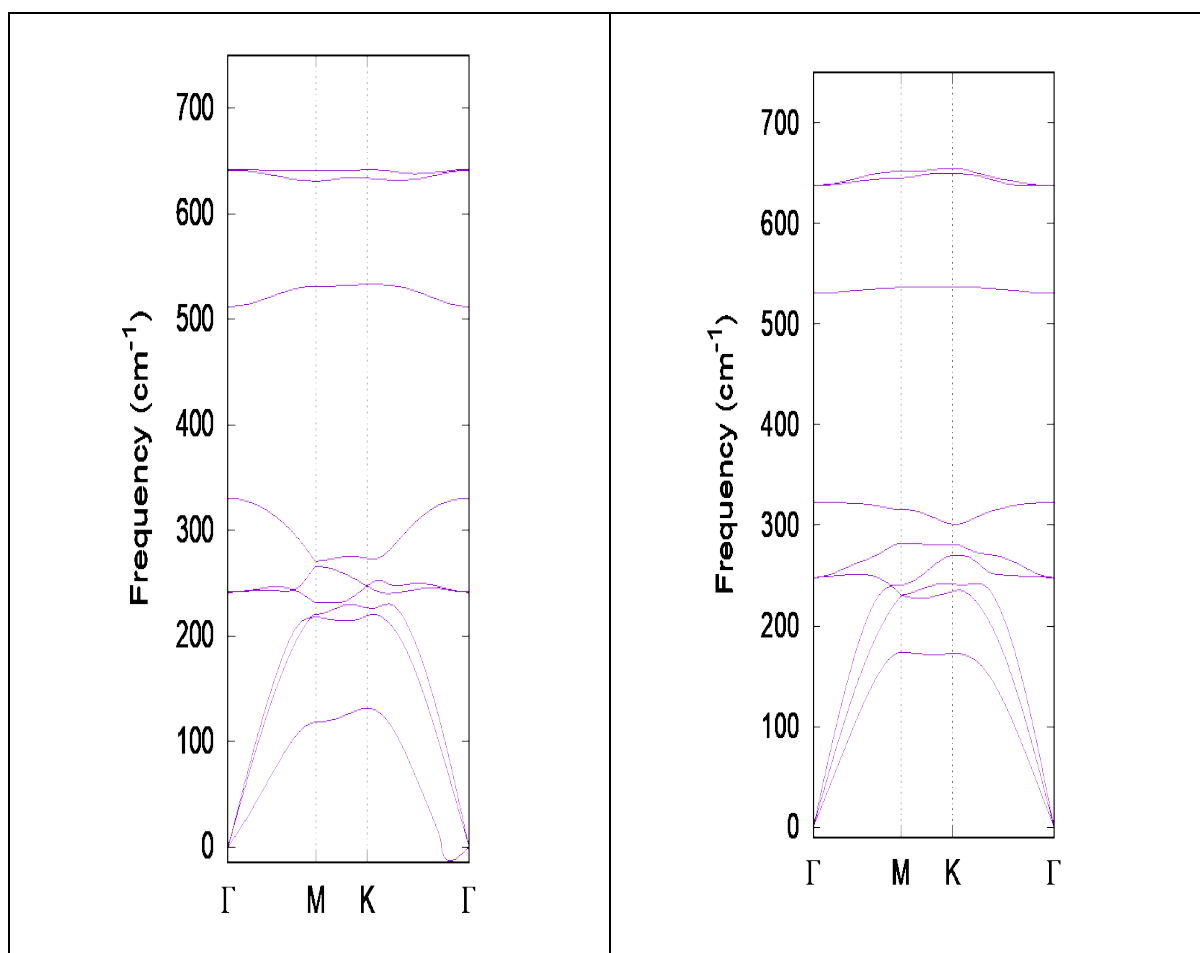

Supplement: d3cp04402e1.pdf [file d3cp04402e1.pdf]
